# 1 **Predictors of good contraception attitude and practice among female** 2 **students of television studies in Nigeria: a secondary analysis**

3

4 **Philip Adewale Adeoye,<sup>1†\*</sup> Tolu Adeniji,<sup>1</sup> Hadizah Abigail Agbo<sup>1,2</sup>**

5

6 <sup>1</sup>Department of Community Medicine, Jos University Teaching Hospital, Jos, Plateau State, Nigeria,

7 <sup>2</sup>Department of Community Medicine, University of Jos, Jos, Plateau State, Nigeria.

8

9 **\*Corresponding author:** Philip Adewale ADEOYE. Department of Community Medicine, Jos University  
10 Teaching Hospital, Jos, Plateau State, Nigeria. E-mail: [philipadeoye@gmail.com](mailto:philipadeoye@gmail.com). Mobile: +2348062081617

11

## 12 **Abstract**

13 **Background:** Globally contraceptive uptake among young people is increasing; so too is the  
14 high unmet need for family planning among this population, especially in sub-Saharan  
15 Africa. This study assessed attitude and practice item predictors of contraception among  
16 female students of Television studies in Nigeria.

17 **Methods:** This is a secondary analysis of a cross-sectional study among 227 female TV  
18 undergraduates in Nigeria; selected through a simple random technique by balloting. Data  
19 was analyzed using SPSS V.25 and qualitative data were presented as frequencies and  
20 proportions. Predictors of good attitude and practice were determined by multivariable  
21 logistic regression. P-value<0.05 was adjudged significant.

22 **Results:** most (91%) of respondents are aware of contraception. Most (94.9%) of the  
23 respondents have had unplanned pregnancies and only 42.1% had ever used contraception.  
24 Predictors of good attitude include good knowledge that female sterilization is one way to  
25 avoid pregnancy (aOR: 2.244 [95%CI: 1.170, 4.304]; p=0.015); and opportunity for  
26 switching in case of side-effect (aOR: 2.310 [95%CI: 1.166, 4.578]; p=0.016); and using both  
27 condoms and pills is very effective (aOR: 1.965 [95%CI: 1.005, 3.840]; p=0.048). The  
28 predictor of good contraceptive practice is a poor perception of the adequacy of the current  
29 method being used (aOR: 3.236 [95%CI: 1.455, 7.196]; p=0.004).

30 **Conclusion:** This study shows that most respondents are aware of contraception. However,  
31 they show poor attitudes to and practice of contraception. There is a need to consolidate  
32 comprehensive sex education in all secondary and tertiary institutions; especially in non-  
33 science disciplines to improve the attitude and practice of contraception and ensure  
34 reproductive well-being and educational development of the girl-child. There is also the need  
35 for community action through community dialogue to improve poor contraceptive attitudes  
36 among young women.

37 **Keywords:** *knowledge, attitude, practice, contraception, female undergraduates*

38

## 39 **Introduction**

40 Almost 30 years ago since the 1994 International Conference on Population and  
41 Development, significant progress has been made in adolescent reproductive rights and  
42 health. Adolescents are more likely to marry later, delay sexual intercourse, use contraception  
43 and delay childbirth compared to 30 years ago. This progress has however been uneven  
44 within and between countries.<sup>1</sup>

45 Though sexual debt among adolescents has declined in sub-Saharan Africa, sexual activity is  
46 highest among adolescents compared to other regions; reflecting the higher rates of child  
47 marriages and early sexual debut within marriage in the region. Due to increased  
48 experimentation with sexual activity, sexually transmitted infections (STIs) have increased  
49 among young people; with Africa having the highest prevalence for genital herpes, and  
50 gonorrhoea- with females having a higher prevalence.<sup>1</sup>

51 The proportion of young women who were married before 18 years decreased in the last 30  
52 years; with the highest declines reported in Northern Africa, Western and Southern Asia.  
53 Also, early childbearing has declined since the early 1990s. However, this remained highest  
54 in sub-Saharan Africa Latin America and the Caribbean.<sup>1</sup> Shorter interval pregnancies among  
55 young mothers pose further risks for both the mother and child.<sup>2</sup>

56 However, there has been a doubling of contraceptive use among adolescents compared to a  
57 decade ago- which currently stands at 21%. Latin America has the highest contraceptive use  
58 and a rapid rise in sub-Saharan Africa (from 4 to 15%) in the last 20 years. Contraception  
59 among unmarried sexually active adolescent girls is higher compared to their married  
60 counterparts.<sup>2</sup> Condoms account for 70% of the total modern contraceptive uptake among  
61 older sexually active adolescents; while pills and injectables account for a similar 70% of  
62 modern contraceptive use among married older adolescents.<sup>3</sup> Contraception is a way by  
63 which safe sex is ensured, unplanned pregnancies, early childbearing, STI, and maternal  
64 health risks are reduced.

65 With reduced age at menarche and onset of sexual activity, there is a heightened risk of  
66 unplanned sexual intercourse, unplanned pregnancy, unsafe abortion, severe puerperal illness,  
67 infertility maternal mortality, and adverse birth outcomes. Individual factors such as risk  
68 perception, fear of side-effects, opposition of partners, health system limitations,  
69 insufficient/lack of knowledge, sociocultural and religious factors are some of the barriers to  
70 contraception among female university undergraduates in sub-Saharan Africa.<sup>4-8</sup>

71 In Nigeria, contraceptive use increased from 6.0% in 1999 to 16.6% in 2018; with the south-  
72 west having the highest prevalence of 35.1% and the north-west with the lowest prevalence  
73 (6.7%). The north-central has a prevalence of 16.2%. In the north-central, plateau state has  
74 the highest prevalence (21.4%) of modern contraceptive use. contraceptive prevalence among  
75 sexually active unmarried women is 37%, and 28% for modern contraceptive use. Condom  
76 remains the commonest among unmarried sexually active women. There is a higher demand

77 and unmet need for contraception among sexually unmarried compared to married women in  
78 Nigeria.<sup>4</sup>

79 However, appropriate knowledge and attitude should drive healthful and healthy reproductive  
80 behaviour across populations. Among university female undergraduates who are older young  
81 persons, the situation is the same; and in this population, knowledge, attitude and practice on  
82 contraception is at best average.<sup>9</sup> It is during this period that adolescents and young people  
83 begin to experiment with sexual activities while lacking requisite knowledge on reproductive  
84 health.<sup>10,11</sup> This lack of knowledge on reproductive health issues, limited implementation of  
85 comprehensive sex education in schools and poor parental knowledge has hindered  
86 discussion on sexual health issues. This makes adolescents, who are coming from a restrictive  
87 high school environment to a liberal university environment, to be vulnerable to harmful  
88 sexual behaviours.

89 Though there have been many studies assessing knowledge, attitude and practice among  
90 female undergraduates in Nigeria, there has not been any such study- to the best of the  
91 knowledge of the researchers- specifically among female TV studies undergraduates in  
92 Nigeria; as this population may be involved in mass media health education and risk  
93 communication for community mobilization in the future. Also, a secondary item analysis  
94 might provide insight into the levels of knowledge, attitude and practice on contraception  
95 earlier reported in a previous study.<sup>9</sup>

## 96 **Methods**

97 **Study design:** this is a secondary analysis of a previously published cross-sectional study;<sup>9</sup>  
98 which revealed the levels of good knowledge, attitude and practice of contaception to be  
99 about average; with majority obtaining information on contraception from friends and the  
100 internet; and the commonly used contraception being condom and oral contraceptive pills.  
101 Further item analysis is to maximize the value and to provide insight into the items that were  
102 of value in predicting good attitudes and practice of contraception among the study  
103 population.

104 **Study area:** Nigeria is a sub-Saharan African country in the western region. It is the most  
105 populous black nation on earth with an estimated population of 200million. There are about  
106 64 million youths in Nigeria-about a third of the Nigerian population; with 51.6% female  
107 population.<sup>12</sup>

108 Plateau State, located in the North-central region of Nigeria, covers a land area of 26,899  
109 square kilometres with an estimated population of almost 5 million. It is a multi-ethnic state;  
110 with English and Hausa being the commonly spoken languages. Because of its high altitude,  
111 it has a near-temperate climate. It has 5 specialized higher educational institutions out of the  
112 12 higher institutions awarding post-secondary school certificates.<sup>13</sup>

113 NTA TV College is a specialized higher educational institution established in 1980 to address  
114 human resource challenges in the TV/broadcast industry. It is located in Rayfield, Jos-  
115 metropolis, Plateau State. It is the only TV College offering diplomas and degrees in TV

116 journalism and production in Nigeria. It is currently an affiliate of Ahmadu Bello University,  
117 Zaria, Nigeria.<sup>14</sup>

118 **Study population:** these are female NTA TV College students who consented to participate  
119 in this study. The primary study shows that this study participants have an average age of  
120 21.9 ( $\pm$  2.64) years; with most (91.2%) not living with a spouse or partner; Christian (91.2%);  
121 almost two-thirds (58.1%) under the degree programme; and half (51%) with a monthly  
122 income below the minimum wage; almost two-thirds are resident of the state and a majority  
123 (76.7%) living off-campus when in school and 69.6% in the TV journalism course.<sup>9</sup>

124 **Sample size determination:** sample size was determined using Cochran's sample size  
125 formula:  $n = z^2 pq / d^2$ ; <sup>15</sup> where n=minimum sample size; z=standard normal deviate at 95%  
126 confidence interval=1.96; p=proportion of female undergraduates with good knowledge of  
127 contraception=0.84; <sup>16</sup> q=alternate probability =1-0.84=0.16; d= precision at 5% error=0.05.  
128 Therefore, the minimum sample size is 206. Correcting for 10% nonresponse makes the total  
129 sample size=227.

130 **Sampling technique:** the female students were selected using a simple random sampling  
131 technique by balloting for all six levels during classes in the college using the proportion-to-  
132 size approach.

133 **Study tool/data collection method:** data collection was by the use of semi-structured self-  
134 administered questionnaires following informed written consent by each selected participant.  
135 The questionnaire has four sections: knowledge, attitude and practice of contraception and  
136 sexual behaviour. It was piloted and pretested in a comparable institution (National Film  
137 Institute) before the commencement of the study to detect errors, test for fidelity and  
138 feasibility and participant understanding of the items of the questionnaire.

139 **Data analysis:** data was entered in and analyzed by SPSS V.25 (IBM, Armonk, NY, USA).  
140 Qualitative variables were presented as frequencies and proportions. Simple logistic  
141 regression was used to determine factors that are associated with good attitude and practice to  
142 contraception; and to determine candidate variables for the multivariable analysis. Variables  
143 with less than 10% probability of error were selected and added into the multivariable  
144 omnibus model to determine the predictors of good attitude and practice of contraception. P-  
145 value<0.05 was adjudged statistically significant.

146 **Ethics approval and consent to participate:** ethics approval was obtained from the JUTH  
147 Research and Ethics Committee (JUTHH/DCS/IREC/127/XXXI/2619). Written informed  
148 consent was obtained from each of the study participants before the commencement of the  
149 study; which was voluntary and withdrawal was allowed at any stage of the research process.  
150 There is no potential hazard to study participants.

151

152

153

154

155

156

157

158

## Results

159

**Table 1: Knowledge of Contraception among female students at NTA TV College Jos**

| Variable                                                                                            | Frequency (%) |
|-----------------------------------------------------------------------------------------------------|---------------|
| <b>Ever heard of contraception (n=214)</b>                                                          |               |
| Yes (good knowledge)                                                                                | 195 (91.1)    |
| No/ I don't know (poor knowledge)                                                                   | 19 (8.9)      |
| <b>Pills are effective with 2-3 omissions (n=211)</b>                                               |               |
| No (good knowledge)                                                                                 | 59 (28.0)     |
| Yes/I don't know (poor knowledge)                                                                   | 152 (72.0)    |
| <b>Female sterilization is one way to avoid pregnancy (n=213)</b>                                   |               |
| Yes (good knowledge)                                                                                | 98 (46.0)     |
| No/ I don't know (poor knowledge)                                                                   | 115 (54.0)    |
| <b>Health education is important for its use (n=215)</b>                                            |               |
| Yes (good knowledge)                                                                                | 191 (88.8)    |
| No/ I don't know (poor knowledge)                                                                   | 24 (11.2)     |
| <b>Pills guarantee 100% protection (n=214)</b>                                                      |               |
| No (good knowledge)                                                                                 | 133 (62.1)    |
| Yes/I don't know (poor knowledge)                                                                   | 81 (37.9)     |
| <b>Condoms do not prevent STI (n=214)</b>                                                           |               |
| No (good knowledge)                                                                                 | 78 (36.4)     |
| Yes/I don't know (poor knowledge)                                                                   | 136 (63.6)    |
| <b>Pill common side-effect include mood swings and weight gain (n=213)</b>                          |               |
| Yes (good knowledge)                                                                                | 104 (48.8)    |
| No/ I don't know (poor knowledge)                                                                   | 109 (51.2)    |
| <b>Increased risk of breast cancer with those taking estrogen-containing contraceptives (n=217)</b> |               |
| Yes (good knowledge)                                                                                | 78 (35.9)     |
| No/ I don't know (poor knowledge)                                                                   | 139 (64.1)    |
| <b>Those using depo must get injections every 3 months (n=213)</b>                                  |               |
| Yes (good knowledge)                                                                                | 70 (32.9)     |
| No/ I don't know (poor knowledge)                                                                   | 143 (67.1)    |
| <b>If there is a side-effect; switching might help (n=217)</b>                                      |               |
| Yes (good knowledge)                                                                                | 70 (32.3)     |
| No/ I don't know (poor knowledge)                                                                   | 147 (67.7)    |
| <b>Using both condoms and pills is very effective (n=216)</b>                                       |               |
| Yes (good knowledge)                                                                                | 124 (57.4)    |
| No/ I don't know (poor knowledge)                                                                   | 92 (42.6)     |
| <b>Pills increase the risk of cervical cancer (n=217)</b>                                           |               |
| Yes (good knowledge)                                                                                | 100 (46.1)    |
| No/ I don't know (poor knowledge)                                                                   | 117 (53.9)    |

160

161

162

163

164

165

*Table 1* above shows that the majority have heard about family planning; and know that health education is important for its use. About two-thirds know that pills do not guarantee 100% protection; and know that using both the condom and pills is very effective. Below half of the respondents know that pills may increase the risk of breast and cervical cancers; know the common side-effects of pills and know that female sterilization is a method of contraception. About one-third know that condoms

166 do prevent STIs; increase the risk of breast cancer among those using oral contraceptive pills; Depo  
 167 given every 3 months and a switch might be necessary if there is a side-effect. Only 28% know that  
 168 pills become ineffective with 2-3 omissions or missed intake.

169 **Table 2: Attitude to contraception among female students at NTA TV College Jos**

| Variables                                                                             | Frequency<br>(percentage) |
|---------------------------------------------------------------------------------------|---------------------------|
| <b>It should be used to limit my number of children (n=214)</b>                       |                           |
| Poor attitude (Neutral/Disagree/Strongly Disagree)                                    | 176 (82.2)                |
| Good attitude (Strongly Agree/Agree)                                                  | 38 (17.8)                 |
| <b>Should be used to increase the time interval between my child's births (n=214)</b> |                           |
| Poor attitude (Neutral/Disagree/Strongly Disagree)                                    | 179 (83.6)                |
| Good attitude (Strongly Agree/Agree)                                                  | 35 (16.4)                 |
| <b>Spacing will allow a child to be healthier (n=216)</b>                             |                           |
| Poor attitude (Neutral/Disagree/Strongly Disagree)                                    | 190 (88.0)                |
| Good attitude (Strongly Agree/Agree)                                                  | 26 (12.0)                 |
| <b>Ideal age for having a first child is between 20 and 30 years of age (n=211)</b>   |                           |
| Poor attitude (Neutral/Disagree/Strongly Disagree)                                    | 180 (85.3)                |
| Good attitude (Strongly Agree/Agree)                                                  | 31 (14.7)                 |
| <b>Ideal number of children between 3 and 5 (n=212)</b>                               |                           |
| Poor attitude (Neutral/Disagree/Strongly Disagree)                                    | 181 (85.4)                |
| Good attitude (Strongly Agree/Agree)                                                  | 31 (14.6)                 |
| <b>Contraceptives provide a sense of safety (n=211)</b>                               |                           |
| Poor attitude (Neutral/Disagree/Strongly Disagree)                                    | 176 (83.4)                |
| Good attitude (Strongly Agree/Agree)                                                  | 35 (16.6)                 |
| <b>The method I am using is adequate (n=203)</b>                                      |                           |
| Poor attitude (Neutral/Disagree/Strongly Disagree)                                    | 149 (73.4)                |
| Good attitude (Strongly Agree/Agree)                                                  | 54 (26.6)                 |
| <b>Benefits males too (n=209)</b>                                                     |                           |
| Poor attitude (Neutral/Disagree/Strongly Disagree)                                    | 150 (71.8)                |
| Good attitude (Strongly Agree/Agree)                                                  | 59 (28.2)                 |
| <b>Discussion about contraception with partner is embarrassing (n=209)</b>            |                           |
| Poor (Strongly Agree/Agree/Neutral)                                                   | 165 (78.9)                |
| Good (Disagree/Strongly Disagree)                                                     | 44 (21.1)                 |
| <b>Partner does not approve of my use of contraceptives (n=206)</b>                   |                           |
| Poor (Strongly Agree/Agree/Neutral)                                                   | 159(77.2)                 |
| Good (Disagree/Strongly Disagree)                                                     | 47 (22.8)                 |
| <b>Can protect the health of family and community (n=212)</b>                         |                           |
| Poor attitude (Neutral/Disagree/Strongly Disagree)                                    | 173 (81.6)                |
| Good attitude (Strongly Agree/Agree)                                                  | 39 (18.4)                 |
| <b>Religious beliefs can prevent women from using contraceptives (n=213)</b>          |                           |
| Poor attitude (Neutral/Disagree/Strongly Disagree)                                    | 169 (79.3)                |
| Good attitude (Strongly Agree/Agree)                                                  | 44 (20.7)                 |
| <b>Cultural beliefs can prevent women from using contraceptives (n=211)</b>           |                           |
| Poor attitude (Neutral/Disagree/Strongly Disagree)                                    | 179 (84.8)                |
| Good attitude (Strongly Agree/Agree)                                                  | 32 (15.2)                 |
| <b>Partner's objection can prevent women from using contraceptives (n=216)</b>        |                           |
| Poor attitude (Neutral/Disagree/Strongly Disagree)                                    | 180 (83.3)                |
| Good attitude (Strongly Agree/Agree)                                                  | 36 (16.7)                 |
| <b>Change in male attitude can improve contraceptive use (n=216)</b>                  |                           |
| Poor attitude (Neutral/Disagree/Strongly Disagree)                                    | 161 (74.5)                |
| Good attitude (Strongly Agree/Agree)                                                  | 55 (25.5)                 |

170

171 **Table 2** above shows that the majority, or most, of the tertiary students have poor attitudes to issues  
 172 regarding contraception. For example, only a minority of respondents believe that contraception



173 provides a sense of safety; important in child spacing and child health; and the perception of the  
 174 adequacy of the contraception in use.

175

176 **Table 3: Practice of contraception among female students at NTA TV College Jos**

| Variables                                                                                 | Frequency (percentage) |
|-------------------------------------------------------------------------------------------|------------------------|
| <b>How often do you visit the healthcare centre for contraception<sup>a</sup> (n=215)</b> |                        |
| Poor practice (usually/sometimes/seldom/never)                                            | 73 (34.0)              |
| Good practice (Always)                                                                    | 142 (66.0)             |
| <b>Uses contraceptives to prevent unplanned pregnancy (n=215)</b>                         |                        |
| Poor practice (usually/sometimes/seldom/never)                                            | 103 (47.9)             |
| Good practice (Always)                                                                    | 112 (52.1)             |
| <b>Ever had unplanned pregnancy due to contraceptive non-use (n=215)</b>                  |                        |
| Poor (Always/usually/sometimes/seldom)                                                    | 204 (94.9)             |
| Good practice (Never)                                                                     | 11 (5.1)               |
| <b>Do you use contraceptives when you do not intend to get pregnant (n=215)</b>           |                        |
| Poor practice (usually/sometimes/seldom/never)                                            | 103 (47.9)             |
| Good practice (Always)                                                                    | 112 (52.1)             |
| <b>Use different types of contraceptives (n=215)</b>                                      |                        |
| Poor practice (usually/sometimes/seldom/never)                                            | 64 (29.8)              |
| Good practice (Always)                                                                    | 151 (70.2)             |
| <b>Current method changes from time to time (n=211)</b>                                   |                        |
| Poor (Always/usually/sometimes/seldom)                                                    | 197 (93.4)             |
| Good practice (Never)                                                                     | 14 (6.6)               |
| <b>Practice traditional/natural methods when not using any contraceptive (n=215)</b>      |                        |
| Poor practice (usually/sometimes/seldom/never)                                            | 68 (31.6)              |
| Good practice (Always)                                                                    | 147 (68.4)             |
| <b>Ever used or currently using contraception (n=214)</b>                                 |                        |
| No                                                                                        | 124 (57.9)             |
| Yes                                                                                       | 90 (42.1)              |

177 <sup>a</sup>procurement of contraception services from health facilities

178 **Table 3** above shows that more than two-thirds always visit health facilities for contraception; always  
 179 use different types of contraceptives per time; and always practice natural methods when not using  
 180 any modern method. About half always use contraceptives to prevent unplanned pregnancy or when  
 181 they do not want to get pregnant. Only about 5.1% had never had an unplanned pregnancy due to non-  
 182 use, and 6.6% had never changed their current contraceptive from time to time.

183

184 **Table 4** below shows individuals who know that female sterilization is a method of contraception are  
 185 twice significantly more likely to have a good attitude towards contraception compared to those who  
 186 do not know. Those who know that switching to another contraceptive might help with dealing with  
 187 the side-effects of a method are twice significantly more likely to have a good attitude towards  
 188 contraception compared to those who do not know. Those who know that using both condoms and  
 189 pills is very effective are almost twice significantly more likely to have a good attitude towards  
 190 contraception compared to those who do not know.

191

192

193

194

195 **Table 4: knowledge predictors of good attitude to contraception among female students at NTA TV**

196 **College Jos**

| VARIABLE                                                                                    | $\beta$ | OR (95% CI)             | P-value | $\beta$ | aOR (95% CI)            | P-value |
|---------------------------------------------------------------------------------------------|---------|-------------------------|---------|---------|-------------------------|---------|
| <b>Ever heard of contraception</b>                                                          |         |                         |         |         |                         |         |
| good knowledge                                                                              | -0.714  | 0.490<br>(0.185, 1.297) | 0.151   | -       | -                       | -       |
| poor knowledge (ref)                                                                        |         |                         |         |         |                         |         |
| <b>Pills are effective with 2-3 omissions</b>                                               |         |                         |         |         |                         |         |
| good knowledge                                                                              | 0.545   | 1.725<br>(0.940, 3.168) | 0.078*# | 0.376   | 1.457<br>(0.727, 2.920) | 0.288   |
| poor knowledge (ref)                                                                        |         |                         |         |         |                         |         |
| <b>Female sterilization is one way to avoid pregnancy</b>                                   |         |                         |         |         |                         |         |
| good knowledge                                                                              | 1.211   | 3.356<br>(1.910, 5.897) | 0.000*# | 0.808   | 2.244<br>(1.170, 4.304) | 0.015*  |
| poor knowledge (ref)                                                                        |         |                         |         |         |                         |         |
| <b>Health education is important for its use</b>                                            |         |                         |         |         |                         |         |
| good knowledge                                                                              | 0.877   | 2.403<br>(0.953, 6.059) | 0.063#  | 0.685   | 1.984<br>(0.675, 5.835) | 0.213   |
| poor knowledge (ref)                                                                        |         |                         |         |         |                         |         |
| <b>Pills guarantee 100% protection</b>                                                      |         |                         |         |         |                         |         |
| good knowledge                                                                              | -0.221  | 0.802<br>(0.461, 1.395) | 0.434   | -       | -                       | -       |
| poor knowledge (ref)                                                                        |         |                         |         |         |                         |         |
| <b>Condoms do not prevent STI</b>                                                           |         |                         |         |         |                         |         |
| good knowledge                                                                              | -0.228  | 0.796<br>(0.455, 1.393) | 0.424   | -       | -                       | -       |
| poor knowledge (ref)                                                                        |         |                         |         |         |                         |         |
| <b>Pill common side-effect include mood swings and weight gain</b>                          |         |                         |         |         |                         |         |
| good knowledge                                                                              | 0.699   | 2.011<br>(1.165, 3.474) | 0.012*# | 0.083   | 1.086<br>(0.562, 2.098) | 0.806   |
| poor knowledge (ref)                                                                        |         |                         |         |         |                         |         |
| <b>Increased risk of breast cancer with those taking estrogen-containing contraceptives</b> |         |                         |         |         |                         |         |
| good knowledge                                                                              | 0.893   | 2.444<br>(1.383, 4.316) | 0.002*# | 0.627   | 1.871<br>(0.957, 3.658) | 0.067   |
| poor knowledge (ref)                                                                        |         |                         |         |         |                         |         |
| <b>Those using Depo must get injections every 3 months</b>                                  |         |                         |         |         |                         |         |
| good knowledge                                                                              | 0.848   | 2.334<br>(1.299, 4.192) | 0.005*# | 0.414   | 1.513<br>(0.768, 2.978) | 0.231   |
| poor knowledge (ref)                                                                        |         |                         |         |         |                         |         |
| <b>If there is a side-effect; switching might help</b>                                      |         |                         |         |         |                         |         |
| good knowledge                                                                              | 1.295   | 3.650<br>(1.993, 6.685) | 0.000*# | 0.837   | 2.310<br>(1.166, 4.578) | 0.016*  |
| poor knowledge (ref)                                                                        |         |                         |         |         |                         |         |
| <b>Using both condom and pill very effective</b>                                            |         |                         |         |         |                         |         |
| good knowledge                                                                              | 1.134   | 3.110<br>(1.764, 5.482) | 0.000*# | 0.675   | 1.965<br>(1.005, 3.840) | 0.048*  |
| poor knowledge (ref)                                                                        |         |                         |         |         |                         |         |
| <b>Pills increase the risk of cervical cancer</b>                                           |         |                         |         |         |                         |         |
| good knowledge                                                                              | -0.109  | 0.897<br>(0.525, 1.531) | 0.689   | -       | -                       | -       |
| poor knowledge                                                                              |         |                         |         |         |                         |         |

Model characteristics: Omnibus Test of Model Coefficient ( $X^2$ ; df):42.520;8;  $p=0.000$ ;  $-2\log$  likelihood=232.503; Cos & Snell  $R^2=0.192$ ; Nagelkerke  $R^2=0.257$ ; Percentage Accuracy=67.8%. \* =significance at  $p<0.05$ ; # =candidate variable for multivariable regression

197

198



199 **Table 5** below shows that those who have poor attitudes towards the adequacy of their current  
 200 contraception are three times significantly more likely to have good contraceptive practices compared  
 201 to those who have good attitudes.

202

203 **Table 5: knowledge and attitude predictors of good contraception practice among female students at NTA**  
 204 **TV College Jos**

| VARIABLE                                                                                    | B      | OR (90% CI)             | P-value        | β     | aOR (95% CI)            | P-value |
|---------------------------------------------------------------------------------------------|--------|-------------------------|----------------|-------|-------------------------|---------|
| <b>Ever heard of contraception</b>                                                          |        |                         |                |       |                         |         |
| good knowledge                                                                              | -0.075 | 0.928<br>(0.361, 2.384) | 0.877          | -     | -                       | -       |
| poor knowledge (ref)                                                                        |        |                         |                |       |                         |         |
| <b>Pills are effective with 2-3 omissions</b>                                               |        |                         |                |       |                         |         |
| good knowledge                                                                              | -0.302 | 0.740<br>(0.405, 1.352) | 0.327          | -     | -                       | -       |
| poor knowledge (ref)                                                                        |        |                         |                |       |                         |         |
| <b>Female sterilization is one way to avoid pregnancy</b>                                   |        |                         |                |       |                         |         |
| good knowledge                                                                              | 0.175  | 1.191<br>(0.694, 2.043) | 0.525          | -     | -                       | -       |
| poor knowledge (ref)                                                                        |        |                         |                |       |                         |         |
| <b>Health education is important for its use</b>                                            |        |                         |                |       |                         |         |
| good knowledge                                                                              | 0.031  | 1.032<br>(0.442, 2.412) | 0.942          | -     | -                       | -       |
| poor knowledge (ref)                                                                        |        |                         |                |       |                         |         |
| <b>Pills guarantee 100% protection</b>                                                      |        |                         |                |       |                         |         |
| good knowledge                                                                              | -0.329 | 0.720<br>(0.413, 1.254) | 0.246          | -     | -                       | -       |
| poor knowledge (ref)                                                                        |        |                         |                |       |                         |         |
| <b>Condoms do not prevent STI</b>                                                           |        |                         |                |       |                         |         |
| good knowledge                                                                              | 0.570  | 1.767<br>(1.006, 3.106) | <b>0.048*#</b> | 0.532 | 1.702<br>(0.885, 3.275) | 0.111   |
| poor knowledge (ref)                                                                        |        |                         |                |       |                         |         |
| <b>Pill common side-effect include mood swings and weight gain</b>                          |        |                         |                |       |                         |         |
| good knowledge                                                                              | 0.625  | 1.868<br>(1.084, 3.217) | <b>0.024*#</b> | 0.419 | 1.520<br>(0.778, 2.970) | 0.221   |
| poor knowledge (ref)                                                                        |        |                         |                |       |                         |         |
| <b>Increased risk of breast cancer with those taking estrogen-containing contraceptives</b> |        |                         |                |       |                         |         |
| good knowledge                                                                              | 0.604  | 1.829<br>(1.041, 3.212) | <b>0.036*#</b> | 0.268 | 1.307<br>(0.654, 2.611) | 0.448   |
| poor knowledge (ref)                                                                        |        |                         |                |       |                         |         |
| <b>Those using Depo must get injections every 3 months</b>                                  |        |                         |                |       |                         |         |
| good knowledge                                                                              | 0.532  | 1.701<br>(0.953, 3.039) | 0.073#         | 0.141 | 1.152<br>(0.580, 2.287) | 0.687   |
| poor knowledge (ref)                                                                        |        |                         |                |       |                         |         |
| <b>If there is a side-effect; switching might help</b>                                      |        |                         |                |       |                         |         |
| good knowledge                                                                              | 0.731  | 2.077<br>(1.159, 3.723) | <b>0.014*#</b> | 0.287 | 1.333<br>(0.670, 2.654) | 0.413   |
| poor knowledge (ref)                                                                        |        |                         |                |       |                         |         |
| <b>Using both condoms and pills is very effective</b>                                       |        |                         |                |       |                         |         |
| good knowledge                                                                              | 0.880  | 2.410<br>(1.386, 4.190) | <b>0.002*#</b> | 0.501 | 1.650<br>(0.849, 3.206) | 0.140   |
| poor knowledge (ref)                                                                        |        |                         |                |       |                         |         |
| <b>Pills increase the risk of cervical cancer</b>                                           |        |                         |                |       |                         |         |
| good knowledge                                                                              | 0.246  | 1.279<br>(0.749, 2.183) | 0.368          | -     | -                       | -       |
| poor knowledge (ref)                                                                        |        |                         |                |       |                         |         |
| <b>It should be used to limit the number of children</b>                                    |        |                         |                |       |                         |         |
| poor attitude                                                                               | 0.151  | 1.163<br>(0.576, 2.346) | 0.674          | -     | -                       | -       |
| good attitude (ref)                                                                         |        |                         |                |       |                         |         |

*Model characteristics: Omnibus Test of Model Coefficient ( $X^2$ ; df):33.063;10;  $p=0.000$ ;  $-2\log$  likelihood=227.560; Cos & Snell  $R^2=0.161$ ; Nagelkerke  $R^2=0.215$ ; Hosmer-Lemeshow  $R^2 p=0.228$ ; percentage accuracy=68.1%. \*=significance at  $p<0.05$ ; #=candidate variable for multivariable regression*

205 **Table 5 (contd): knowledge and attitude predictors of good contraception practice among female students**  
 206 **at NTA TV College Jos**

| VARIABLE                                                                      | B      | OR (90% CI)             | P-value        | β      | aOR (95% CI)            | P-value       |
|-------------------------------------------------------------------------------|--------|-------------------------|----------------|--------|-------------------------|---------------|
| <b>Should be used to increase the time interval between my child's births</b> |        |                         |                |        |                         |               |
| poor attitude                                                                 | 0.250  | 1.284<br>(0.621, 2.656) | 0.500          | -      | -                       | -             |
| good attitude (ref)                                                           |        |                         |                |        |                         |               |
| <b>Spacing will allow a child to be healthier</b>                             |        |                         |                |        |                         |               |
| poor attitude                                                                 | 0.217  | 1.243<br>(0.546, 2.827) | 0.604          | -      | -                       | -             |
| good attitude (ref)                                                           |        |                         |                |        |                         |               |
| <b>Ideal age for having a first child is between 20 and 30 years of age</b>   |        |                         |                |        |                         |               |
| poor attitude                                                                 | 0.239  | 1.269<br>(0.591, 2.729) | 0.541          | -      | -                       | -             |
| good attitude (ref)                                                           |        |                         |                |        |                         |               |
| <b>Ideal number of children between 3 and 5</b>                               |        |                         |                |        |                         |               |
| poor attitude                                                                 | 0.060  | 2.886<br>(1.260, 6.611) | <b>0.012*#</b> | 0.427  | 1.532<br>(0.555, 4.231) | 0.411         |
| good attitude (ref)                                                           |        |                         |                |        |                         |               |
| <b>Contraceptives provide a sense of safety</b>                               |        |                         |                |        |                         |               |
| poor attitude                                                                 | 0.401  | 1.494<br>(0.719, 3.106) | 0.282          | -      | -                       | -             |
| good attitude (ref)                                                           |        |                         |                |        |                         |               |
| <b>The method I am using is adequate</b>                                      |        |                         |                |        |                         |               |
| poor attitude                                                                 | 1.089  | 2.971<br>(1.536, 5.748) | <b>0.001*#</b> | 1.174  | 3.236<br>(1.455, 7.196) | <b>0.004*</b> |
| good attitude (ref)                                                           |        |                         |                |        |                         |               |
| <b>Benefits males too</b>                                                     |        |                         |                |        |                         |               |
| poor attitude                                                                 | -0.388 | 0.679<br>(0.370, 1.246) | 0.211          | -      | -                       | -             |
| good attitude (ref)                                                           |        |                         |                |        |                         |               |
| <b>Discussion about contraception with partner is embarrassing</b>            |        |                         |                |        |                         |               |
| poor attitude                                                                 | -0.219 | 0.804<br>(0.412, 1.566) | 0.521          | -      | -                       | -             |
| good attitude (ref)                                                           |        |                         |                |        |                         |               |
| <b>Partner does not approve of my use of contraceptives</b>                   |        |                         |                |        |                         |               |
| poor attitude                                                                 | 0.125  | 1.134<br>(0.590, 2.180) | 0.707          | -      | -                       | -             |
| good attitude (ref)                                                           |        |                         |                |        |                         |               |
| <b>Can protect the health of family and community</b>                         |        |                         |                |        |                         |               |
| poor attitude                                                                 | 0.490  | 1.633<br>(0.807, 3.303) | 0.173          | -      | -                       | -             |
| good attitude (ref)                                                           |        |                         |                |        |                         |               |
| <b>Religious beliefs can prevent women from using contraceptives</b>          |        |                         |                |        |                         |               |
| poor attitude                                                                 | -0.427 | 0.653<br>(0.333, 1.278) | 0.213          | -      | -                       | -             |
| good attitude (ref)                                                           |        |                         |                |        |                         |               |
| <b>Cultural beliefs can prevent women from using contraceptives</b>           |        |                         |                |        |                         |               |
| poor attitude                                                                 | -0.544 | 0.580<br>(0.268, 1.257) | 0.168          | -      | -                       | -             |
| good attitude (ref)                                                           |        |                         |                |        |                         |               |
| <b>Partner's objection can prevent women from using contraceptives</b>        |        |                         |                |        |                         |               |
| poor attitude                                                                 | -0.637 | 0.529<br>(0.252, 1.109) | 0.092#         | -0.800 | 0.449<br>(0.183, 1.102) | 0.080         |
| good attitude (ref)                                                           |        |                         |                |        |                         |               |
| <b>Change in male attitude can improve contraceptive use</b>                  |        |                         |                |        |                         |               |
| poor attitude                                                                 | -0.594 | 0.552<br>(0.295, 1.033) | 0.063#         | -0.722 | 0.486<br>(0.221, 1.069) | 0.073         |
| good attitude (ref)                                                           |        |                         |                |        |                         |               |

Model characteristics: Omnibus Test of Model Coefficient ( $X^2$ ; df):33.063;10;  $p=0.000$ ;  $-2\log$  likelihood=227.560; Cos & Snell  $R^2=0.161$ ; Nagelkerke  $R^2=0.215$ ; Hosmer-Lemeshow  $R^2 p=0.228$ ; percentage accuracy=68.1%. \*=significance at  $p<0.05$ ; #=candidate variable for multivariable regression

207

## 208 **Discussion**

209 Most of the respondents, in this study, had heard of contraception. This is similar to those  
210 observed among similar populations in Dodoma-Tanzania, states in North-Central Nigeria,  
211 Thohoyandou-South Africa, and Suva-Fiji.<sup>5,6,17-19</sup> This may be due to increased sensitization  
212 and community mobilization on contraception in most countries of the world; especially in  
213 lower- and middle-income countries (LMICs).<sup>20</sup> This will need to be sustained especially in  
214 hard-to-reach regions of the world.

215 Furthermore, almost half of the respondents know that female sterilization is an option to  
216 avoid pregnancy. Lower values and similarly average proportions have been reported similar  
217 proportion in Dodoma- Rwanda and Nigeria among similar populations.<sup>4,5</sup> This variation may  
218 be due to limited practical in-depth details about contraception; especially at the grassroots.

219 Health education has been reported by the majority of these study respondents as important  
220 for successful contraceptive use. This is similar to those observed in Kigali-Rwanda,  
221 Gaborone-Botswana and Suva-Fiji among similar populations.<sup>6,21,22</sup> This shows a  
222 corresponding enthusiasm that a very high awareness might have created.

223 Below average of respondents know that risks associated with OCP include breast, and  
224 cervical cancers. A similar observation was reported among similar populations in Suva-Fiji.<sup>6</sup>  
225 However, higher proportions were reported in Thohoyandou- South Africa.<sup>18</sup> This may be  
226 due to improved reporting and access to some cancer screening services in the Southern  
227 Africa region in Sub-Saharan Africa.<sup>23</sup>

228 About a third of respondents know that switching may help if there is a side-effect; a higher  
229 proportion of knowledge was reported among women in Suva-Fiji.<sup>6</sup> Despite this, only a small  
230 proportion of contraceptive users switch among Nigerian unmarried sexually active women  
231 in a recent survey.<sup>4</sup> This might be due to improved selection of appropriate contraceptives for  
232 women of reproductive age group which had probably minimized the side-effects associated  
233 with contraceptives.

234 Most respondents of this study have poor attitude towards contraception across contraceptive  
235 attitude. This is similar to the attitude of undergraduates in Pa Nang-Vietnam and  
236 Malaysia.<sup>24,25</sup> This may be as are result of socio-cultural factors that still surround  
237 contraception in many LMICs.<sup>20</sup>

238 The majority of respondents do not believe that spacing will make their children healthy; and  
239 found it unnecessary to increase birth intervals. Contrary opinion was expressed by an equal  
240 proportion of women in Suva -Fiji.<sup>6</sup> A similar opinion in support of definite birth spacing was  
241 reported in Senegal, where *Nef* (short birth interval) is frowned upon and stigmatizing; and in  
242 line with evidence of adverse birth outcomes for the mother and child.<sup>26</sup> Thus, there is a need  
243 for culture-specific tailoring of contraceptive education and mobilization; as not all caps fit  
244 all.

245 Almost three-quarters do not believe that contraceptives benefit males too. This is contrary to  
246 that which is observed in similar populations in Kigali-Rwanda and Suva-Fiji;<sup>6,22</sup> where more  
247 than three-quarters have good attitude that males benefit also from contraception. This may  
248 explain why contraception is thought to be in the main interest of the woman and some  
249 Nigerian men will be involved in family planning programmes to show love and support for  
250 their wives.<sup>7</sup>

251 Majority of the female undergraduates in the study site disagree that the ideal age for the  
252 onset of childbearing should be between 20 and 30 years of age. This is, however, different  
253 for the majority of women in Suva-Fiji.<sup>6</sup> This might be due to the widespread teenage  
254 pregnancies; which are being normalized in many states in Northern Nigeria childhood and  
255 teenage pregnancies and marriage also have the backing of cultural and religious factors in  
256 many communities in Nigeria. The increasing numbers of out-of-school teenagers in Nigeria  
257 might have also contributed to the normalizing of teenage pregnancies and marriages in  
258 Nigeria.<sup>28</sup>

259 From this study, a majority do not believe that their current contraceptive is adequate. This is  
260 contrary to the perception expressed by a similar population in Suva-Fiji.<sup>6</sup> This might be  
261 responsible for the use of different types and frequent changes of contraceptives from time to  
262 time among the study population which was not seen among similar populations in Suva-Fiji.  
263 Therefore, there may be a need for increased confidence in contraception via community  
264 mobilization and participation in contraception activities.

265 This study shows that many of the study participants visit the healthcare centres for  
266 contraceptive uptake. This might be due to the freely available contraceptives at these public  
267 healthcare facilities in the state in which the study was done.<sup>29</sup> This is however contrary to  
268 those by contrary to those reported by similar populations in Dodoma-Tanzania, Suva-Fiji  
269 and women of reproductive age in many LMICs.<sup>4,5,7</sup> This might also be due to cultural and  
270 social factors surrounding procurement of contraceptives by young people from the public  
271 sector which might be ebbing in places where contraceptives are procured from public  
272 places. Procuring contraceptives by this population from sites outside the public sector may  
273 affect accurate reporting of contraceptive use as these sites are not routinely captured in  
274 national data.<sup>30</sup>

275 Most of the study participants have had unplanned pregnancies due to the non-use of  
276 contraception. This is, however, contrary to a similar population in Suva-Fiji whose majority  
277 had never had unplanned pregnancy.<sup>6</sup> This might be responsible for the use and intention to  
278 use. Contraception, subsequently, by more than half of the respondents. There is therefore the  
279 need to strengthen the Federal Ministry of Education's family life and HIV/AIDS Education  
280 early in the education sector to prevent the adverse effects of teenage pregnancies.<sup>31</sup> There is  
281 also the need to engage and commit families in the design and implementation of  
282 comprehensive sex education.<sup>8</sup>

283

284 Majority of the study participants practised traditional/natural methods (TCM) when not  
285 using any modern contraception. This is similar to those reported among similar populations  
286 in Kilimanjaro-Tanzania and Suva-Fiji.<sup>6,32</sup> This is however contrary to those reported among

287 similar populations in Kigali-Rwanda, Romania, and Kano-Nigeria.<sup>33-35</sup> This may be as a  
288 result of unmet needs, safety concerns, side-effect and opposition to modern contraceptive  
289 use by partners; and the effectiveness of TCM.<sup>35,36</sup>

290

291 Less than half of respondents have ever used contraception among the study population. This  
292 is similar to those reported among similar populations in Kilimanjaro- Tanzania and  
293 Nigeria.<sup>4,32</sup> This is however different for similar populations in Kigali-Rwanda, Romania and  
294 Makurdi- Nigeria.<sup>19,22,33</sup> This may be due to social and cultural, health systems barriers that  
295 hinder young people from accessing contraceptive services in many LMICs.<sup>4,20</sup> This might  
296 have also explained the higher number of unplanned pregnancies experienced by this study  
297 population.<sup>20,23</sup>

298 This study shows that knowing that female sterilization is one way to prevent pregnancy is a  
299 prediction of good contraceptive attitude. Though studies on female sterilization are generally  
300 low;<sup>37</sup> it can be hypothesized that a high knowledge of female sterilization is correlated with  
301 a high level of knowledge of other contraceptive methods because knowledge about female  
302 sterilization is lower compared to other methods in many populations. Increased knowledge  
303 of female sterilization is often associated with increased acceptance and uptake, all things  
304 being equal it has been shown compared to other methods, to improve mood and sex life.<sup>22,37</sup>  
305 Generally, it has been said to be the most common family planning method globally among  
306 women of reproductive group.<sup>38</sup>

307 The knowledge that switching might help in the occurrence of side effects is a significant  
308 predictor of good contraceptive attitude. This may increase improved sense of safety; self-  
309 efficacy and perception that clients have control over their reproductive health. The need to  
310 conceive in the near future, fewer side-effects and the expensive nature of long-acting  
311 contraceptives are some of the reasons why long-acting reversible contraceptives have low  
312 patronage compared to the short-acting contraceptive methods in many LMICs.<sup>20</sup>

313 This study also shows that more than half of the respondents know that combined use of  
314 condoms and pills is very effective; and this knowledge is a significant predictor of good  
315 attitude towards contraception. This combination maximises the contraceptive benefits of  
316 pregnancy and STI prevention among adolescents and young adults.

317 The doubt that the method clients are using is adequate is a significant predictor of good  
318 contraceptive use. This might be due to past unplanned pregnancies reported in this study  
319 population and frequent changes and use of different types of contraceptives among this  
320 population. This might have improved attendance at follow-ups after contraceptive uptake  
321 where information on correct use will be consolidated and prompt report of side-effects and  
322 cross-confirmation of any contraceptive information shared might have been responsible for  
323 good practice despite less confidence in the method being used. However, the health system  
324 should continue to boost self-confidence in this population to ensure sustainability of good  
325 contraceptive use.

326

327 This study cannot be generalized to the total female undergraduate population in other higher  
328 institutions since the population is from a specific discipline that may be involved in health  
329 communication and education via mass media in the future. The use of questionnaires might  
330 bias participant's responses as sensitive questions are included in the items. However,  
331 respondents were provided a private setting, adequate preamble, use of anonymous research  
332 assistants and ethical conduct of the interview made respondents relaxed to answer the  
333 questions to the best of their abilities. Also, due to the cross-sectional nature of the study,  
334 temporality cannot be established. Our findings have been one of the few among similar  
335 populations in literature and have huge policies for health promotion; now and in the future.  
336 This is a cross-sectional study and therefore causality cannot be established  
337

## 338 **Conclusion**

339 This study showed that though most respondents are aware of contraception, they generally  
340 show poor attitude to contraception. Majority had a history of unplanned pregnancies and few  
341 had ever used contraception; though with a willingness to do so. There is, therefore, the need  
342 to consolidate early and appropriate family life and HIV/AIDS education in all levels of  
343 formal education to improve family planning knowledge, attitude and practice in many young  
344 people. There is also a need for community dialogue to improve the poor contraceptive  
345 attitude and the need to involve families and communities in the design and implementation  
346 of contraception activities. This will ensure reproductive health and all-round development of  
347 the girl-child.

348

## 349 **HIGHLIGHTS**

- 350 • Poor attitude and practice of contraception, has been one of the main driven driving up  
351 unsustainable population growth in low- and middle-income countries.
- 352 • Most of the study participants have had past history of unplanned pregnancy
- 353 • Less than half have ever used contraception
- 354 • Knowledge of female sterilization, risk of breast cancer and opportunity of switching predicts  
355 good attitude
- 356 • Perception about the adequacy of current method is a significant predictor of good  
357 contraceptive practice

358

359

## 360 **Acknowledgements**

361 We are grateful to the students of NTA TV College of Nigeria for their willingness to participate in  
362 the study. We also grateful for the research assistants that patiently carried out the data collection.

363

364



365 **Funding**

366 No funding received for this study

367

368 **Conflict of interest**

369 Authors declare no conflict of interest

370

371 **Contributions**

372 Conceptualization and design: PAA, HAO;

373 Data analysis and interpretation: PAA;

374 Drafting and critical review: HAO, PAA, TA;

375 Final approval: HAO, PAA, TA.

376

377

378 **References**

- 379 1. Liang M, Simelane S, Fortuny Fillo G, Chalasani S, Weny K, Salazar Canelos P, et al. The  
380 State of Adolescent Sexual and Reproductive Health. *Journal of Adolescent Health*.  
381 2019;65(6):S3-S15.
- 382 2. Kozuki N, Lee A, Silveira M, Victora C, Adair L, Humphrey JN, Robert, et al. The  
383 associations of birth intervals with small-for-gestational-age, preterm, and neonatal and infant  
384 mortality: a meta-analysis. *BMC Public Health*. 2013;13(Suppl 3):S3.
- 385 3. Loaiza E, Luchsinger G, Liang M. *Universal Access to Reproductive Health: Progress and  
386 Challenges*. Report. New York: UNFPA; 2016.
- 387 4. Nigeria Population Commission. *Nigeria demographic and health survey 2018*. Abuja,  
388 Nigeria: NPC, ICF; 2019.
- 389 5. Kara WSK, Benedicto M, Mao J. Knowledge, Attitude, and Practice of Contraception  
390 Methods Among Female Undergraduates in Dodoma, Tanzania. *Cureus*. 2019;11(4):e4362.
- 391 6. Lincoln J, Mohammadnezhad M, Khan S. Knowledge, attitudes, and practices of family  
392 planning among women of reproductive age in Suva, Fiji in 2017. *Journal of Women's Health  
393 Care*. 2018;7(3):431.
- 394 7. Bradley SEK, Shiras T. Where Women Access Contraception in 36 Low- and Middle-Income  
395 Countries and Why It Matters. *Global Health: Science and Practice*. 2022;10(3):e2100525.
- 396 8. Wekesah FM, Nyakangi V, Onguss M, Njagi J, Bangha M. *Comprehensive Sexuality  
397 Education in Sub-Saharan Africa*. Nairobi, Kenya: African Population and Health Research  
398 Center; 2019.

- 399 9. Agbo HA, Adeoye PA, Yilzung DR, Mangut JS, Ogbada PF. Levels and predictors of  
400 knowledge, attitude and practice of contraception among female TV undergraduates in  
401 Nigeria: a cross-sectional study. medRxiv. 2024.
- 402 10. Azzopardi PS, Hearps SJC, Francis KL, Kennedy EC, Mokdad AH, Kassebaum NJ, et al.  
403 Progress in adolescent health and wellbeing: tracking 12 headline indicators for 195 countries  
404 and territories, 1990-2016. Lancet. 2019;393(10176):1101–18.
- 405 11. Weiss HA, Ferrand RA. Improving adolescent health: an evidence-based call to action.  
406 Lancet. 2019;393(10176):1073-5.
- 407 12. National Bureau of Statistics, Federal Ministry of Youth Development. National Baseline  
408 Youth Survey 2012. Abuja, Nigeria: National Bureau of Statistics; 2012.
- 409 13. Plateau State ICT Development Agency. At a Glance: About Plateau State Jos, Nigeria:  
410 Plateau State Government; 2020 [Available from: [https://www.plateaustate.gov.ng/plateau/at-](https://www.plateaustate.gov.ng/plateau/at-a-glance)  
411 [a-glance](https://www.plateaustate.gov.ng/plateau/at-a-glance)].
- 412 14. NTA Television College. About Us Jos, Nigeria: NTA Television College,; 2021 [Available  
413 from: [https://ntatvc.edu.ng/?page\\_id=2876](https://ntatvc.edu.ng/?page_id=2876)].
- 414 15. Bolarinwa OA. Sample size estimation for health and social science researchers: The  
415 principles and considerations for different study designs. Nigerian Postgraduate Medical  
416 Journal. 2020;27(2):67-75.
- 417 16. Eniojukan J, Ijeoma O, Okinedo P. Knowledge, perception and practice of contraception  
418 among staff and students in a University Community in Delta State, Nigeria. Pharmaceutical  
419 and Biosciences Journal. 2015;4(1):71-81.
- 420 17. Abdul I, Imohagene AO, L , Adesina K, Oguntoye M, Popoola G. Awareness, knowledge and  
421 contraceptive use among female students in University of Ilorin, Nigeria. Journal of  
422 Epidemiological Society of Nigeria. 2018;2(2):1-8.
- 423 18. Raselekoane RN, Chinyakata R, Gwatimba L. An investigation of the knowledge, attitudes  
424 and use of contraceptives by youth development female students at the University of Venda. J  
425 Hum Ecol. 2018;61(1-3):1-8.
- 426 19. Utoo B, Eka P, Utoo P, Unazi E, Maanongun M. Sexual Activity and Contraceptive use  
427 among University Female Undergraduates in Makurdi, North-Central Nigeria. Western  
428 Journal of Medical and Biomedical Sciences. 2020;1(2):132-8.
- 429 20. Sedgh G, Ashford LS, Hussain R. Unmet need for contraception in developing countries:  
430 examining women’s reasons for not using a method. New York: Guttmacher Institute; 2016.
- 431 21. Hoque ME, Ntsipe T, Mokgatle-Nthabu M. Awareness and practices of contraceptive use  
432 among university students in Botswana. SAHARA J. 2013;10(2):83-8.
- 433 22. Sitini B, Okova R, Nizeyimana F, Rutayisire E. Knowledge, Attitude and Practices towards  
434 contraceptive Use among Unmarried Females Students at Mount Kenya University Rwanda.  
435 Journal of Clinical Review & Case Reports. 2020;5(12):520-7.
- 436 23. Adeoye PA. Epidemiology of Breast Cancer in Sub-Saharan Africa. In: Selim Sözen and  
437 Seyfi Emir, editors. Breast Cancer Updates. London, United Kingdom: IntechOpen Limited;  
438 2023.
- 439 24. Ngoc TA, Sen HTN. Knowledge and Attitude Towards Contraceptive Methods Among First-  
440 Year Nursing Students in Da Nang, Vietnam. Ramathibodi Medical Journal. 2022;45(3):23-  
441 32.

- 442 25. Oo MS, Ismail NBM, Ean WR, Hamid HA, Affendi NR. Knowledge, attitude and perception  
443 of contraception among medical students in Universiti Putra Malaysia. *Malaysian Journal of*  
444 *Public Health Medicine*. 2019;19(2):11-9.
- 445 26. Duclos D, Cavallaro FL, Ndoye T, Faye SL, Diallo I, Lynch CA, et al. Critical insights on the  
446 demographic concept of "birth spacing": locating Nef in family well-being, bodies, and  
447 relationships in Senegal. *Sexual and Reproductive Health Matters*. 2019;27(1):136-45.
- 448 27. Adelekan A, Omoregie P, Edoni E. Male involvement in family planning: challenges and way  
449 forward. *International Journal of Population Research*. 2014;2014(Article ID 416457):9.
- 450 28. Joel M. Understanding Nigeria's teenage pregnancy burden Johannesburg: Africa Check;  
451 2021 [Available from: [https://africacheck.org/fact-checks/factsheets/factsheet-understanding-](https://africacheck.org/fact-checks/factsheets/factsheet-understanding-nigerias-teenage-pregnancy-burden)  
452 [nigerias-teenage-pregnancy-burden](https://africacheck.org/fact-checks/factsheets/factsheet-understanding-nigerias-teenage-pregnancy-burden)].
- 453 29. McGuire C, Calhoun LA-O, Mumuni T, Maytan-Joneydi A, Odeku M, Speizer IS.  
454 Government stakeholders' perspectives on the family planning environment in three Nigerian  
455 cities: qualitative findings from the Nigerian Urban Reproductive Health Initiative (NURHI)  
456 Sustainability Study. *Global health action*. 2020;13(1):1847821.
- 457 30. Cunningham M, Bock A, Brown N, Sacher S, Hatch B, Inglis A, et al. Estimating  
458 Contraceptive Prevalence Using Logistics Data for Short-Acting Methods: Analysis Across  
459 30 Countries. *Global Health: Science and Practice*. 2015;3(3):462-81.
- 460 31. Shiffman J, Kunnuji M, Shawar YR, Robinson RS. International norms and the politics of  
461 sexuality education in Nigeria. *Globalization and health*. 2014;14(1):63.
- 462 32. Sweya MN, Msuya SE, Mahande MJ, Manongi R. Contraceptive knowledge, sexual behavior,  
463 and factors associated with contraceptive use among female undergraduate university students  
464 in Kilimanjaro region in Tanzania. *Adolescent health, medicine and therapeutics*. 2016;7:109-  
465 15.
- 466 33. Blidaru IE, Furau G, Socolov D. Female Romanian university students' attitudes and  
467 perceptions about contraception and motherhood. *The European Journal of Contraception &*  
468 *Reproductive Health Care*. 2016;21(1):39-48.
- 469 34. Mbarushimana V, Ntaganira J. Knowledge and attitude to female condom use among  
470 undergraduates of Kigali Health Institute. *Rwanda Journal of Health Sciences*. 2013;2(1):16-  
471 25.
- 472 35. Rabiou A, Rufa'i AA. The role of traditional contraceptive methods in family planning among  
473 women attending primary health care centers in Kano. *Annals of African medicine*.  
474 2018;17(4):189-95.
- 475 36. Bertrand JT, Ross JA, Sauter SR. Trends in contraceptive method mix among adolescents and  
476 youth aged 15-24 in low- and middle-income countries. *Frontiers in Global Women's Health*.  
477 2022;3:1061648.
- 478 37. Kohls F, Kuehnle E, Brodowski L, Staboulidou I. Female sterilization as a method of  
479 contraception: women's acceptance and knowledge-a review. *Medical Research Archives*.  
480 2017;5(9).
- 481 38. Sung S, Abramovitz A. *Tubal Ligation*. Treasure Island (FL): StatPearls Publishing; 2019.
- 482
